# Supplementary material for: A framework for understanding the path to achieve high resilience of maritime supply chain: A case study of China shipping industry
Source: Research Square preprint supplement (doi:10.21203/rs.3.rs-4990878/v1), 2024-10-10
Supplement: Supplementary file 1 [file e9ca27e0e1cdfffbcd9a4e08.docx]

**Supplementary information**

**Appendix 1：**

**Questionnaire on factors affecting the resilience of maritime supply chain**

Questionnaire number：__________

Dear experts,

We are the investigation group of the Influence Factors of Maritime Supply Chain Resilience in the Navigation College of Jimei University. We would like to take a few minutes of your valuable time to ask you to evaluate the various indicators in the following questionnaire. Our questions are simple, we would like you to mark "√" on the corresponding options. The data obtained from this survey will only be used for analysis and research, and there is no right or wrong answer to the survey questions. Therefore, please answer based on your true feelings and thoughts. Thank you for your support, participation, and cooperation!

**1. Early warning (EA) and maritime supply chain resilience**

**EA1: Our company can accurately predict the fluctuations in the shipping market.**

(1) Totally disagree (2) Somewhat disagree (3) Unclear (4) Somewhat agree (5) Completely agree

**EA2: Our company can dynamically monitor and assess key risks in maritime transportation.**

(1) Totally disagree (2) Somewhat disagree (3) Unclear (4) Somewhat agree (5) Completely agree

**EA3: Our company has established a comprehensive maritime risk warning mechanism.**

(1) Totally disagree (2) Somewhat disagree (3) Unclear (4) Somewhat agree (5) Completely agree

**EA4: Our company can establish smooth risk information transmission channels with upstream and downstream enterprises in the MSC.**

(1) Totally disagree (2) Somewhat disagree (3) Unclear (4) Somewhat agree (5) Completely agree

**2. Agility (AG) and maritime supply chain resilience**

**AG1: Our company can quickly adjust resources such as routes, capacity, personnel, and equipment in the face of maritime emergencies.**

(1) Totally disagree (2) Somewhat disagree (3) Unclear (4) Somewhat agree (5) Completely agree

**EA2: Our company can dynamically monitor and assess key risks in maritime transportation.**

(1) Totally disagree (2) Somewhat disagree (3) Unclear (4) Somewhat agree (5) Completely agree

**AG3：Our company can quickly carry out organizational restructuring in the face of maritime emergencies.**

(1) Totally disagree (2) Somewhat disagree (3) Unclear (4) Somewhat agree (5) Completely agree

**AG4: Our company has emergency plans and regular drills for various maritime emergencies.**

(1) Totally disagree (2) Somewhat disagree (3) Unclear (4) Somewhat agree (5) Completely agree

**3. Synergy (SY) and maritime supply chain resilience**

**SY1: Our company has established long-term and stable cooperative relationships with customers.**

(1) Totally disagree (2) Somewhat disagree (3) Unclear (4) Somewhat agree (5) Completely agree

**SY2: Our company has established long-term and stable cooperative relationships with upstream and downstream partners in the MSC.**

(1) Totally disagree (2) Somewhat disagree (3) Unclear (4) Somewhat agree (5) Completely agree

**SY3: We have clear collaboration goals, organizations, processes, and mechanisms for sharing benefits and risks between our company and enterprises in the MSC.**

(1) Totally disagree (2) Somewhat disagree (3) Unclear (4) Somewhat agree (5) Completely agree

**SY4: Our company has a high level of information sharing with upstream and downstream enterprises in the MSC.**

(1) Totally disagree (2) Somewhat disagree (3) Unclear (4) Somewhat agree (5) Completely agree

**4. Digitalization (DL) and maritime supply chain resilience**

**DL1: Our company has improved the operational efficiency and decision-making level of maritime-related businesses through digitization.**

(1) Totally disagree (2) Somewhat disagree (3) Unclear (4) Somewhat agree (5) Completely agree

**DL2：Our enterprise can provide customers with a full process visualization and one-stop supply chain logistics solution through digitization.**

(1) Totally disagree (2) Somewhat disagree (3) Unclear (4) Somewhat agree (5) Completely agree

**DL3：Our maritime supply chain has established a big data platform to integrate, share and collaborate with trade, maritime, logistics and customs data.**

(1) Totally disagree (2) Somewhat disagree (3) Unclear (4) Somewhat agree (5) Completely agree

**DL4：The MSC in which our company operates utilizes digital technologies such as blockchain to achieve paperless documentation.**

(1) Totally disagree (2) Somewhat disagree (3) Unclear (4) Somewhat agree (5) Completely agree

**5. Carbon Reduction (CR) and maritime supply chain resilience**

**CR1：Our company has established a clear carbon emission control plan.**

(1) Totally disagree (2) Somewhat disagree (3) Unclear (4) Somewhat agree (5) Completely agree

**CR2：Our company strictly implemented carbon emission control as planned.**

(1) Totally disagree (2) Somewhat disagree (3) Unclear (4) Somewhat agree (5) Completely agree

**CR3: Our company actively uses green shipping related decarbonization technology.**

(1) Totally disagree (2) Somewhat disagree (3) Unclear (4) Somewhat agree (5) Completely agree

**6. Our company's maritime supply chain resilience ( MSCR)**

**MSCR1: Our company has the ability to adapt to MSC shocks.**

(1) Totally disagree (2) Somewhat disagree (3) Unclear (4) Somewhat agree (5) Completely agree

**MSCR2: Our company is able to respond quickly to MSC shocks.**

(1) Totally disagree (2) Somewhat disagree (3) Unclear (4) Somewhat agree (5) Completely agree

**MSCR3: Our company can reduce its losses in the face of MSC shocks.**

(1) Totally disagree (2) Somewhat disagree (3) Unclear (4) Somewhat agree (5) Completely agree

**7. Your personal information**

**7.1 The nature of your enterprise.**

(1) Foreign-owned enterprise (2) State-owned enterprises (3) Private enterprises

(4) Hong Kong, Macao and Taiwan enterprises (5) Joint venture

**7.2 The scale (size of the staff) of your enterprises**

(1) ＜100 (2) 101-300 (3) 301-500 (4) 501-1000 (5) 1001-2000 (6) ＞2001

**7.3 Which department in the maritime supply chain does the enterprise belong to.**

(1) Shipping companies (2) Port groups (3) Freight forwarding companies

(4) shipping agent companies (5) Shipbuilding companies (6) Crew service companies

(7) Marine fuel oil supply company (8) Shipping finance companies (insurance, finance leasing, etc.) (9) Import and export companies (10) Shipping-related government departments(customs, maritime bureau, commodity inspection, etc.) (11) Port collection and distribution companies (road, railway, inland river, etc.) (12) Others

**7.4 Your position in the company.**

(1) Enterprise senior management (2) Enterprise middle management (3) Enterprise grass-roots staff

**7.5 Your comments and suggestions:**

**______________________________________________________________________________________________________________________________________________________________________________**

Thank you very much for participating in the questionnaire despite your busy schedule!

Contact Person: Xiuqian Chen

E-mail address: chenxiuqian0814@163.com

Address: College of Navigation, Jimei University, Xiamen, Fujian 361021,China

**Appendix 2：**

**Questionnaire collection data**

Beginning in May 2023 and ending in November 2023, with the help of the China Shipowners' Association, this study distributed questionnaires to over a hundred MSC-related companies in China. Ultimately 151 valid questionnaires were obtained, details are shown as Table1 (The numbers represent specific options for each question in the questionnaire).

**Table 1. Questionnaire results raw data**

| **Questions** | **Replier1** | **Replier2** | **Replier3** | **Replier4** | **Replier5** | **Replier6** | **Replier7** | **Replier8** | **Replier9** | **Replier10** |
| --- | --- | --- | --- | --- | --- | --- | --- | --- | --- | --- |
| **EA1** | 4 | 2 | 5 | 3 | 3 | 2 | 3 | 3 | 4 | 1 |
| **EA2** | 4 | 5 | 5 | 3 | 4 | 4 | 5 | 4 | 4 | 4 |
| **EA3** | 4 | 5 | 5 | 4 | 4 | 3 | 5 | 4 | 4 | 4 |
| **EA4** | 4 | 5 | 5 | 4 | 4 | 4 | 5 | 5 | 4 | 5 |
| **AG1** | 2 | 5 | 5 | 4 | 5 | 4 | 5 | 5 | 4 | 5 |
| **AG2** | 4 | 5 | 5 | 5 | 3 | 4 | 4 | 5 | 3 | 5 |
| **AG3** | 4 | 5 | 5 | 4 | 1 | 4 | 3 | 2 | 4 | 2 |
| **AG4** | 4 | 4 | 5 | 4 | 4 | 4 | 5 | 5 | 4 | 5 |
| **SY1** | 4 | 5 | 5 | 5 | 5 | 4 | 5 | 5 | 3 | 5 |
| **SY2** | 4 | 5 | 5 | 4 | 4 | 5 | 5 | 5 | 2 | 5 |
| **SY3** | 4 | 3 | 5 | 3 | 5 | 4 | 5 | 4 | 4 | 4 |
| **SY4** | 2 | 5 | 5 | 2 | 5 | 4 | 5 | 5 | 4 | 5 |
| **DL1** | 4 | 4 | 5 | 3 | 5 | 5 | 5 | 5 | 3 | 5 |
| **DL2** | 4 | 4 | 5 | 3 | 5 | 2 | 5 | 5 | 4 | 4 |
| **DL3** | 4 | 1 | 5 | 3 | 2 | 2 | 3 | 1 | 2 | 3 |
| **DL4** | 2 | 2 | 5 | 3 | 5 | 4 | 2 | 5 | 3 | 4 |
| **CR1** | 4 | 5 | 5 | 3 | 4 | 4 | 5 | 5 | 4 | 5 |
| **CR2** | 4 | 2 | 5 | 4 | 4 | 4 | 5 | 5 | 3 | 4 |
| **CR3** | 4 | 5 | 5 | 4 | 4 | 4 | 5 | 5 | 4 | 5 |
| **MSCR1** | 4 | 4 | 5 | 4 | 4 | 4 | 5 | 5 | 4 | 4 |
| **MSCR2** | 4 | 4 | 5 | 3 | 4 | 4 | 5 | 5 | 4 | 4 |
| **MSCR3** | 4 | 4 | 5 | 3 | 5 | 4 | 5 | 5 | 4 | 3 |
| **Enterprise nature** | 2 | 2 | 2 | 2 | 2 | 2 | 2 | 2 | 2 | 2 |
| **Enterprise scale** | 4 | 6 | 3 | 6 | 4 | 3 | 4 | 4 | 6 | 6 |
| **Business scope** | 3 | 1 | 1 | 1 | 1 | 1 | 1 | 1 | 1 | 1 |
| **Respondent position** | 1 | 2 | 2 | 3 | 3 | 2 | 2 | 1 | 2 | 2 |

**Continued table (1)**

| **Questions** | **Replier11** | **Replier12** | **Replier13** | **Replier14** | **Replier15** | **Replier16** | **Replier17** | **Replier18** | **Replier19** | **Replier20** |
| --- | --- | --- | --- | --- | --- | --- | --- | --- | --- | --- |
| **EA1** | 2 | 4 | 4 | 1 | 3 | 4 | 1 | 3 | 2 | 4 |
| **EA2** | 4 | 5 | 4 | 4 | 2 | 4 | 3 | 4 | 4 | 4 |
| **EA3** | 4 | 5 | 4 | 1 | 1 | 4 | 3 | 4 | 4 | 4 |
| **EA4** | 4 | 5 | 5 | 5 | 2 | 5 | 3 | 4 | 5 | 4 |
| **AG1** | 4 | 5 | 5 | 5 | 1 | 5 | 4 | 4 | 3 | 3 |
| **AG2** | 4 | 5 | 5 | 5 | 2 | 5 | 5 | 4 | 4 | 4 |
| **AG3** | 4 | 5 | 5 | 5 | 2 | 5 | 5 | 4 | 3 | 4 |
| **AG4** | 4 | 5 | 5 | 5 | 4 | 5 | 3 | 4 | 5 | 3 |
| **SY1** | 4 | 5 | 5 | 5 | 5 | 5 | 3 | 5 | 5 | 5 |
| **SY2** | 5 | 5 | 5 | 5 | 5 | 4 | 4 | 5 | 5 | 5 |
| **SY3** | 4 | 5 | 5 | 5 | 2 | 4 | 2 | 4 | 3 | 4 |
| **SY4** | 2 | 5 | 5 | 4 | 5 | 1 | 5 | 5 | 4 | 4 |
| **DL1** | 4 | 5 | 5 | 5 | 5 | 5 | 4 | 4 | 5 | 3 |
| **DL2** | 4 | 5 | 5 | 4 | 5 | 4 | 2 | 4 | 5 | 3 |
| **DL3** | 4 | 5 | 4 | 5 | 2 | 4 | 2 | 4 | 5 | 4 |
| **DL4** | 4 | 5 | 5 | 4 | 2 | 1 | 3 | 4 | 5 | 4 |
| **CR1** | 4 | 5 | 5 | 4 | 2 | 4 | 4 | 4 | 2 | 3 |
| **CR2** | 4 | 5 | 5 | 5 | 2 | 5 | 2 | 4 | 4 | 3 |
| **CR3** | 4 | 5 | 5 | 4 | 2 | 4 | 4 | 5 | 2 | 3 |
| **MSCR1** | 4 | 5 | 5 | 3 | 4 | 4 | 3 | 4 | 2 | 4 |
| **MSCR2** | 4 | 5 | 5 | 5 | 4 | 5 | 1 | 4 | 4 | 4 |
| **MSCR3** | 4 | 5 | 5 | 5 | 4 | 5 | 3 | 4 | 4 | 3 |
| **Enterprise nature** | 2 | 1 | 2 | 3 | 3 | 3 | 1 | 1 | 3 | 3 |
| **Enterprise scale** | 4 | 1 | 6 | 1 | 1 | 1 | 6 | 6 | 2 | 2 |
| **Business scope** | 11 | 1 | 1 | 3 | 3 | 1 | 3 | 3 | 3 | 3 |
| **Respondent position** | 3 | 1 | 1 | 3 | 2 | 2 | 1 | 1 | 1 | 3 |

**Continued table (2)**

| **Questions** | **Replier21** | **Replier22** | **Replier23** | **Replier24** | **Replier25** | **Replier26** | **Replier27** | **Replier28** | **Replier29** | **Replier30** |
| --- | --- | --- | --- | --- | --- | --- | --- | --- | --- | --- |
| **EA1** | 5 | 5 | 4 | 4 | 5 | 2 | 1 | 5 | 4 | 2 |
| **EA2** | 5 | 5 | 4 | 4 | 5 | 2 | 1 | 5 | 4 | 3 |
| **EA3** | 5 | 5 | 3 | 4 | 5 | 1 | 1 | 5 | 4 | 4 |
| **EA4** | 5 | 4 | 3 | 4 | 5 | 5 | 1 | 5 | 4 | 5 |
| **AG1** | 5 | 5 | 3 | 4 | 5 | 1 | 1 | 5 | 4 | 4 |
| **AG2** | 5 | 4 | 3 | 4 | 5 | 2 | 1 | 5 | 4 | 2 |
| **AG3** | 5 | 5 | 3 | 4 | 5 | 4 | 1 | 5 | 4 | 3 |
| **AG4** | 5 | 4 | 4 | 4 | 5 | 2 | 1 | 5 | 4 | 5 |
| **SY1** | 5 | 5 | 4 | 4 | 5 | 2 | 1 | 5 | 4 | 5 |
| **SY2** | 5 | 5 | 3 | 4 | 5 | 4 | 1 | 5 | 4 | 5 |
| **SY3** | 5 | 5 | 2 | 4 | 5 | 4 | 1 | 5 | 4 | 5 |
| **SY4** | 5 | 5 | 3 | 4 | 5 | 2 | 1 | 5 | 4 | 5 |
| **DL1** | 5 | 5 | 3 | 4 | 5 | 5 | 1 | 5 | 4 | 5 |
| **DL2** | 5 | 5 | 2 | 4 | 5 | 4 | 1 | 5 | 4 | 5 |
| **DL3** | 5 | 5 | 3 | 5 | 5 | 2 | 1 | 5 | 4 | 5 |
| **DL4** | 5 | 5 | 4 | 4 | 5 | 4 | 1 | 5 | 4 | 5 |
| **CR1** | 5 | 5 | 2 | 5 | 5 | 1 | 1 | 5 | 4 | 5 |
| **CR2** | 5 | 4 | 4 | 4 | 5 | 3 | 1 | 5 | 4 | 5 |
| **CR3** | 5 | 5 | 5 | 5 | 5 | 2 | 1 | 5 | 4 | 5 |
| **MSCR1** | 5 | 4 | 4 | 4 | 5 | 2 | 1 | 5 | 4 | 5 |
| **MSCR2** | 5 | 4 | 4 | 4 | 5 | 2 | 1 | 5 | 4 | 5 |
| **MSCR3** | 5 | 5 | 3 | 4 | 5 | 2 | 1 | 5 | 4 | 5 |
| **Enterprise nature** | 2 | 3 | 3 | 3 | 4 | 2 | 1 | 2 | 3 | 3 |
| **Enterprise scale** | 1 | 2 | 1 | 2 | 2 | 3 | 1 | 1 | 2 | 1 |
| **Business scope** | 1 | 11 | 3 | 3 | 3 | 2 | 1 | 2 | 2 | 3 |
| **Respondent position** | 3 | 3 | 2 | 2 | 2 | 2 | 2 | 2 | 1 | 2 |

**Continued table (3)**

| **Questions** | **Replier31** | **Replier32** | **Replier33** | **Replier34** | **Replier35** | **Replier36** | **Replier37** | **Replier38** | **Replier39** | **Replier40** |
| --- | --- | --- | --- | --- | --- | --- | --- | --- | --- | --- |
| **EA1** | 4 | 3 | 1 | 4 | 3 | 5 | 5 | 3 | 2 | 1 |
| **EA2** | 4 | 4 | 5 | 4 | 3 | 5 | 5 | 4 | 4 | 1 |
| **EA3** | 4 | 3 | 4 | 4 | 3 | 5 | 5 | 4 | 4 | 1 |
| **EA4** | 2 | 4 | 4 | 4 | 3 | 5 | 5 | 3 | 5 | 1 |
| **AG1** | 5 | 4 | 4 | 3 | 3 | 5 | 5 | 3 | 4 | 1 |
| **AG2** | 4 | 3 | 4 | 3 | 3 | 5 | 5 | 4 | 4 | 1 |
| **AG3** | 4 | 1 | 4 | 4 | 3 | 5 | 5 | 3 | 4 | 1 |
| **AG4** | 2 | 4 | 4 | 4 | 3 | 5 | 5 | 3 | 5 | 1 |
| **SY1** | 5 | 5 | 5 | 4 | 3 | 5 | 5 | 3 | 5 | 1 |
| **SY2** | 4 | 4 | 5 | 4 | 3 | 5 | 5 | 3 | 5 | 1 |
| **SY3** | 4 | 4 | 4 | 4 | 3 | 5 | 5 | 3 | 4 | 1 |
| **SY4** | 4 | 4 | 2 | 3 | 3 | 5 | 5 | 3 | 4 | 1 |
| **DL1** | 4 | 2 | 4 | 4 | 3 | 5 | 5 | 3 | 5 | 1 |
| **DL2** | 3 | 4 | 4 | 4 | 3 | 5 | 5 | 3 | 4 | 1 |
| **DL3** | 2 | 4 | 4 | 3 | 3 | 5 | 5 | 3 | 4 | 1 |
| **DL4** | 2 | 3 | 4 | 4 | 3 | 5 | 5 | 3 | 4 | 1 |
| **CR1** | 1 | 3 | 4 | 5 | 3 | 5 | 5 | 3 | 5 | 1 |
| **CR2** | 4 | 3 | 4 | 4 | 3 | 5 | 5 | 3 | 4 | 1 |
| **CR3** | 3 | 5 | 2 | 4 | 3 | 5 | 5 | 3 | 5 | 1 |
| **MSCR1** | 4 | 2 | 4 | 4 | 3 | 5 | 5 | 3 | 5 | 1 |
| **MSCR2** | 3 | 3 | 4 | 4 | 3 | 5 | 5 | 3 | 5 | 1 |
| **MSCR3** | 2 | 3 | 4 | 4 | 3 | 5 | 5 | 3 | 5 | 1 |
| **Enterprise nature** | 3 | 2 | 2 | 1 | 2 | 3 | 3 | 3 | 2 | 2 |
| **Enterprise scale** | 1 | 2 | 1 | 6 | 4 | 1 | 4 | 6 | 3 | 6 |
| **Business scope** | 3 | 2 | 8 | 1 | 11 | 1 | 11 | 1 | 11 | 9 |
| **Respondent position** | 2 | 3 | 3 | 3 | 1 | 1 | 2 | 2 | 2 | 3 |

**Continued table (4)**

| **Questions** | **Replier41** | **Replier42** | **Replier43** | **Replier44** | **Replier45** | **Replier46** | **Replier47** | **Replier48** | **Replier49** | **Replier50** |
| --- | --- | --- | --- | --- | --- | --- | --- | --- | --- | --- |
| **EA1** | 1 | 1 | 2 | 2 | 1 | 3 | 5 | 2 | 4 | 3 |
| **EA2** | 1 | 1 | 4 | 3 | 1 | 3 | 5 | 4 | 5 | 3 |
| **EA3** | 1 | 1 | 4 | 2 | 1 | 1 | 5 | 3 | 4 | 3 |
| **EA4** | 1 | 2 | 4 | 2 | 3 | 4 | 4 | 5 | 3 | 3 |
| **AG1** | 1 | 1 | 4 | 2 | 1 | 1 | 5 | 2 | 4 | 3 |
| **AG2** | 1 | 1 | 4 | 2 | 1 | 1 | 5 | 4 | 4 | 3 |
| **AG3** | 1 | 2 | 3 | 3 | 1 | 1 | 5 | 4 | 4 | 3 |
| **AG4** | 1 | 2 | 5 | 2 | 1 | 2 | 4 | 5 | 4 | 3 |
| **SY1** | 1 | 3 | 5 | 4 | 5 | 5 | 4 | 5 | 4 | 2 |
| **SY2** | 1 | 3 | 5 | 4 | 4 | 5 | 4 | 2 | 4 | 3 |
| **SY3** | 1 | 3 | 5 | 4 | 3 | 1 | 4 | 4 | 4 | 2 |
| **SY4** | 1 | 1 | 4 | 3 | 1 | 1 | 4 | 5 | 4 | 3 |
| **DL1** | 1 | 3 | 3 | 4 | 4 | 1 | 4 | 4 | 4 | 4 |
| **DL2** | 1 | 1 | 4 | 4 | 4 | 1 | 4 | 5 | 4 | 2 |
| **DL3** | 1 | 2 | 4 | 4 | 1 | 1 | 4 | 5 | 4 | 2 |
| **DL4** | 1 | 3 | 4 | 4 | 4 | 1 | 4 | 2 | 4 | 3 |
| **CR1** | 1 | 3 | 5 | 1 | 1 | 1 | 4 | 4 | 3 | 4 |
| **CR2** | 1 | 3 | 4 | 2 | 4 | 1 | 4 | 5 | 4 | 3 |
| **CR3** | 1 | 3 | 5 | 2 | 4 | 1 | 4 | 4 | 3 | 5 |
| **MSCR1** | 1 | 3 | 3 | 2 | 4 | 1 | 4 | 3 | 4 | 3 |
| **MSCR2** | 1 | 1 | 4 | 2 | 3 | 1 | 4 | 4 | 4 | 3 |
| **MSCR3** | 1 | 3 | 4 | 2 | 2 | 1 | 4 | 4 | 4 | 2 |
| **Enterprise nature** | 1 | 3 | 1 | 3 | 3 | 2 | 2 | 4 | 4 | 3 |
| **Enterprise scale** | 6 | 1 | 4 | 1 | 1 | 2 | 5 | 1 | 2 | 1 |
| **Business scope** | 8 | 1 | 1 | 11 | 8 | 7 | 1 | 3 | 3 | 8 |
| **Respondent position** | 3 | 2 | 2 | 2 | 2 | 1 | 1 | 1 | 1 | 2 |

**Continued table (5)**

| **Questions** | **Replier51** | **Replier52** | **Replier53** | **Replier54** | **Replier55** | **Replier56** | **Replier57** | **Replier58** | **Replier59** | **Replier60** |
| --- | --- | --- | --- | --- | --- | --- | --- | --- | --- | --- |
| **EA1** | 4 | 4 | 3 | 5 | 5 | 4 | 2 | 4 | 1 | 4 |
| **EA2** | 4 | 4 | 2 | 5 | 5 | 4 | 3 | 4 | 1 | 4 |
| **EA3** | 4 | 4 | 3 | 5 | 5 | 2 | 3 | 5 | 1 | 4 |
| **EA4** | 4 | 4 | 4 | 5 | 5 | 4 | 4 | 4 | 4 | 3 |
| **AG1** | 4 | 4 | 4 | 5 | 5 | 2 | 2 | 4 | 1 | 3 |
| **AG2** | 4 | 4 | 3 | 5 | 5 | 2 | 3 | 5 | 1 | 4 |
| **AG3** | 4 | 4 | 3 | 5 | 5 | 2 | 3 | 5 | 4 | 4 |
| **AG4** | 5 | 4 | 4 | 5 | 5 | 2 | 4 | 5 | 4 | 4 |
| **SY1** | 4 | 4 | 4 | 5 | 5 | 2 | 4 | 4 | 2 | 4 |
| **SY2** | 5 | 4 | 4 | 5 | 5 | 2 | 4 | 4 | 2 | 4 |
| **SY3** | 5 | 4 | 4 | 5 | 5 | 2 | 3 | 4 | 2 | 5 |
| **SY4** | 5 | 4 | 3 | 5 | 5 | 4 | 4 | 4 | 1 | 4 |
| **DL1** | 5 | 4 | 4 | 5 | 5 | 4 | 4 | 4 | 2 | 4 |
| **DL2** | 4 | 4 | 4 | 5 | 5 | 4 | 4 | 4 | 2 | 5 |
| **DL3** | 5 | 4 | 4 | 5 | 5 | 4 | 4 | 4 | 3 | 3 |
| **DL4** | 5 | 4 | 4 | 5 | 5 | 2 | 4 | 4 | 2 | 4 |
| **CR1** | 5 | 4 | 3 | 5 | 5 | 1 | 4 | 4 | 4 | 5 |
| **CR2** | 4 | 4 | 3 | 5 | 5 | 4 | 3 | 5 | 5 | 5 |
| **CR3** | 5 | 4 | 3 | 5 | 5 | 1 | 4 | 4 | 3 | 4 |
| **MSCR1** | 5 | 4 | 3 | 5 | 5 | 4 | 3 | 5 | 4 | 5 |
| **MSCR2** | 4 | 4 | 3 | 5 | 5 | 2 | 4 | 5 | 4 | 5 |
| **MSCR3** | 5 | 4 | 3 | 5 | 5 | 2 | 4 | 5 | 5 | 4 |
| **Enterprise nature** | 3 | 3 | 3 | 5 | 5 | 3 | 4 | 3 | 3 | 5 |
| **Enterprise scale** | 1 | 1 | 2 | 2 | 5 | 1 | 3 | 3 | 2 | 2 |
| **Business scope** | 8 | 11 | 3 | 11 | 7 | 3 | 5 | 8 | 11 | 1 |
| **Respondent position** | 2 | 3 | 3 | 2 | 2 | 1 | 2 | 2 | 3 | 3 |

**Continued table (6)**

| **Questions** | **Replier61** | **Replier62** | **Replier63** | **Replier64** | **Replier65** | **Replier66** | **Replier67** | **Replier68** | **Replier69** | **Replier70** |
| --- | --- | --- | --- | --- | --- | --- | --- | --- | --- | --- |
| **EA1** | 4 | 5 | 2 | 4 | 3 | 4 | 3 | 5 | 2 | 4 |
| **EA2** | 4 | 5 | 2 | 5 | 5 | 4 | 2 | 5 | 2 | 4 |
| **EA3** | 5 | 5 | 4 | 5 | 3 | 5 | 2 | 3 | 2 | 5 |
| **EA4** | 2 | 5 | 2 | 5 | 5 | 4 | 2 | 5 | 3 | 5 |
| **AG1** | 4 | 5 | 2 | 5 | 4 | 3 | 4 | 3 | 2 | 5 |
| **AG2** | 4 | 5 | 5 | 5 | 5 | 4 | 4 | 4 | 2 | 5 |
| **AG3** | 2 | 5 | 4 | 5 | 5 | 4 | 4 | 4 | 2 | 4 |
| **AG4** | 2 | 5 | 5 | 5 | 5 | 5 | 2 | 5 | 3 | 5 |
| **SY1** | 3 | 5 | 4 | 4 | 5 | 5 | 4 | 5 | 4 | 5 |
| **SY2** | 2 | 5 | 4 | 5 | 5 | 4 | 4 | 5 | 2 | 5 |
| **SY3** | 2 | 5 | 4 | 5 | 3 | 5 | 4 | 5 | 3 | 4 |
| **SY4** | 2 | 5 | 2 | 5 | 3 | 5 | 4 | 5 | 4 | 5 |
| **DL1** | 2 | 5 | 4 | 5 | 4 | 5 | 4 | 5 | 2 | 5 |
| **DL2** | 1 | 5 | 4 | 5 | 4 | 5 | 4 | 5 | 2 | 4 |
| **DL3** | 1 | 5 | 2 | 5 | 4 | 5 | 4 | 5 | 2 | 5 |
| **DL4** | 4 | 5 | 4 | 5 | 4 | 4 | 2 | 3 | 3 | 5 |
| **CR1** | 2 | 5 | 5 | 5 | 3 | 4 | 2 | 5 | 2 | 4 |
| **CR2** | 3 | 5 | 5 | 5 | 4 | 5 | 2 | 5 | 3 | 5 |
| **CR3** | 2 | 5 | 5 | 5 | 5 | 3 | 2 | 5 | 3 | 4 |
| **MSCR1** | 3 | 5 | 4 | 5 | 4 | 2 | 2 | 5 | 3 | 5 |
| **MSCR2** | 3 | 5 | 4 | 5 | 4 | 4 | 3 | 5 | 3 | 5 |
| **MSCR3** | 4 | 5 | 4 | 5 | 4 | 5 | 2 | 3 | 3 | 5 |
| **Enterprise nature** | 2 | 3 | 1 | 5 | 3 | 1 | 3 | 2 | 3 | 2 |
| **Enterprise scale** | 1 | 1 | 2 | 1 | 6 | 1 | 1 | 3 | 1 | 1 |
| **Business scope** | 1 | 11 | 8 | 3 | 1 | 3 | 3 | 11 | 3 | 9 |
| **Respondent position** | 2 | 2 | 1 | 2 | 2 | 3 | 1 | 1 | 3 | 2 |

**Continued table (7)**

| **Questions** | **Replier71** | **Replier72** | **Replier73** | **Replier74** | **Replier75** | **Replier76** | **Replier77** | **Replier78** | **Replier79** | **Replier80** |
| --- | --- | --- | --- | --- | --- | --- | --- | --- | --- | --- |
| **EA1** | 1 | 4 | 4 | 4 | 4 | 4 | 5 | 4 | 5 | 1 |
| **EA2** | 4 | 5 | 5 | 3 | 4 | 5 | 5 | 4 | 4 | 2 |
| **EA3** | 4 | 5 | 5 | 3 | 4 | 5 | 5 | 2 | 5 | 4 |
| **EA4** | 1 | 5 | 5 | 4 | 5 | 5 | 5 | 4 | 5 | 4 |
| **AG1** | 4 | 5 | 5 | 3 | 4 | 5 | 5 | 2 | 5 | 4 |
| **AG2** | 4 | 5 | 4 | 4 | 4 | 4 | 5 | 4 | 5 | 4 |
| **AG3** | 3 | 5 | 5 | 4 | 4 | 4 | 4 | 4 | 5 | 1 |
| **AG4** | 1 | 5 | 5 | 4 | 4 | 5 | 5 | 2 | 5 | 2 |
| **SY1** | 4 | 5 | 5 | 3 | 4 | 5 | 5 | 5 | 5 | 5 |
| **SY2** | 3 | 5 | 5 | 4 | 4 | 5 | 5 | 4 | 5 | 5 |
| **SY3** | 4 | 5 | 4 | 4 | 4 | 5 | 5 | 4 | 5 | 5 |
| **SY4** | 3 | 5 | 5 | 4 | 4 | 5 | 5 | 4 | 5 | 4 |
| **DL1** | 3 | 5 | 4 | 4 | 5 | 5 | 5 | 4 | 5 | 5 |
| **DL2** | 3 | 5 | 5 | 4 | 4 | 5 | 5 | 4 | 5 | 2 |
| **DL3** | 3 | 5 | 4 | 4 | 5 | 5 | 5 | 2 | 5 | 2 |
| **DL4** | 4 | 5 | 5 | 4 | 4 | 2 | 4 | 3 | 5 | 2 |
| **CR1** | 4 | 5 | 4 | 3 | 5 | 3 | 5 | 2 | 5 | 2 |
| **CR2** | 3 | 5 | 5 | 4 | 4 | 5 | 5 | 3 | 5 | 1 |
| **CR3** | 2 | 5 | 4 | 3 | 5 | 4 | 5 | 2 | 5 | 2 |
| **MSCR1** | 3 | 5 | 5 | 3 | 4 | 5 | 5 | 4 | 5 | 1 |
| **MSCR2** | 3 | 5 | 5 | 3 | 4 | 4 | 5 | 4 | 5 | 1 |
| **MSCR3** | 3 | 5 | 5 | 4 | 3 | 4 | 5 | 4 | 5 | 1 |
| **Enterprise nature** | 3 | 3 | 3 | 3 | 2 | 3 | 2 | 3 | 2 | 3 |
| **Enterprise scale** | 5 | 1 | 1 | 1 | 4 | 6 | 6 | 1 | 6 | 1 |
| **Business scope** | 1 | 8 | 8 | 8 | 2 | 3 | 1 | 8 | 3 | 3 |
| **Respondent position** | 2 | 1 | 1 | 1 | 3 | 3 | 3 | 2 | 2 | 2 |

**Continued table (8)**

| **Questions** | **Replier81** | **Replier82** | **Replier83** | **Replier84** | **Replier85** | **Replier86** | **Replier87** | **Replier88** | **Replier89** | **Replier90** |
| --- | --- | --- | --- | --- | --- | --- | --- | --- | --- | --- |
| **EA1** | 4 | 3 | 5 | 5 | 1 | 4 | 3 | 4 | 2 | 4 |
| **EA2** | 4 | 4 | 5 | 5 | 4 | 4 | 3 | 3 | 1 | 4 |
| **EA3** | 4 | 3 | 5 | 5 | 4 | 4 | 3 | 3 | 1 | 5 |
| **EA4** | 4 | 4 | 5 | 5 | 2 | 4 | 3 | 4 | 2 | 5 |
| **AG1** | 4 | 2 | 5 | 5 | 4 | 5 | 3 | 3 | 1 | 4 |
| **AG2** | 4 | 2 | 5 | 5 | 4 | 5 | 3 | 3 | 4 | 5 |
| **AG3** | 4 | 2 | 5 | 5 | 1 | 3 | 3 | 3 | 4 | 5 |
| **AG4** | 4 | 5 | 5 | 5 | 5 | 4 | 4 | 4 | 4 | 5 |
| **SY1** | 4 | 5 | 5 | 5 | 4 | 5 | 3 | 5 | 4 | 5 |
| **SY2** | 4 | 3 | 5 | 5 | 4 | 5 | 3 | 5 | 4 | 5 |
| **SY3** | 4 | 2 | 5 | 5 | 4 | 4 | 3 | 4 | 2 | 5 |
| **SY4** | 4 | 5 | 5 | 5 | 4 | 5 | 3 | 4 | 4 | 5 |
| **DL1** | 4 | 3 | 5 | 5 | 4 | 2 | 3 | 3 | 4 | 5 |
| **DL2** | 4 | 3 | 5 | 5 | 4 | 4 | 3 | 3 | 3 | 5 |
| **DL3** | 4 | 2 | 5 | 5 | 4 | 1 | 3 | 4 | 2 | 5 |
| **DL4** | 4 | 4 | 5 | 4 | 4 | 4 | 3 | 3 | 3 | 5 |
| **CR1** | 4 | 4 | 5 | 4 | 4 | 4 | 3 | 3 | 3 | 5 |
| **CR2** | 4 | 5 | 5 | 5 | 4 | 4 | 4 | 3 | 4 | 5 |
| **CR3** | 4 | 4 | 5 | 5 | 4 | 3 | 4 | 3 | 3 | 5 |
| **MSCR1** | 4 | 5 | 5 | 5 | 4 | 4 | 4 | 3 | 4 | 5 |
| **MSCR2** | 4 | 4 | 5 | 5 | 1 | 4 | 3 | 4 | 2 | 5 |
| **MSCR3** | 4 | 5 | 5 | 5 | 1 | 4 | 4 | 4 | 4 | 5 |
| **Enterprise nature** | 2 | 4 | 2 | 2 | 3 | 2 | 3 | 3 | 3 | 1 |
| **Enterprise scale** | 6 | 5 | 6 | 3 | 2 | 5 | 1 | 1 | 1 | 6 |
| **Business scope** | 11 | 5 | 3 | 3 | 3 | 11 | 3 | 8 | 8 | 1 |
| **Respondent position** | 2 | 2 | 2 | 1 | 2 | 2 | 3 | 3 | 3 | 1 |

**Continued table (9)**

| **Questions** | **Replier91** | **Replier92** | **Replier93** | **Replier94** | **Replier95** | **Replier96** | **Replier97** | **Replier98** | **Replier99** | **Replier100** |
| --- | --- | --- | --- | --- | --- | --- | --- | --- | --- | --- |
| **EA1** | 2 | 1 | 3 | 3 | 3 | 2 | 3 | 4 | 3 | 5 |
| **EA2** | 2 | 4 | 4 | 4 | 3 | 4 | 4 | 5 | 4 | 5 |
| **EA3** | 2 | 4 | 2 | 4 | 3 | 5 | 3 | 5 | 4 | 5 |
| **EA4** | 1 | 4 | 4 | 5 | 3 | 4 | 4 | 5 | 4 | 4 |
| **AG1** | 1 | 5 | 4 | 5 | 4 | 5 | 3 | 5 | 4 | 5 |
| **AG2** | 2 | 5 | 4 | 5 | 4 | 4 | 3 | 5 | 4 | 5 |
| **AG3** | 2 | 5 | 4 | 5 | 4 | 2 | 3 | 3 | 2 | 4 |
| **AG4** | 2 | 4 | 4 | 4 | 3 | 4 | 2 | 4 | 3 | 4 |
| **SY1** | 1 | 4 | 4 | 5 | 4 | 5 | 4 | 5 | 4 | 5 |
| **SY2** | 2 | 4 | 4 | 4 | 4 | 5 | 4 | 5 | 4 | 5 |
| **SY3** | 1 | 2 | 4 | 3 | 4 | 4 | 3 | 5 | 4 | 4 |
| **SY4** | 2 | 1 | 4 | 5 | 3 | 2 | 3 | 3 | 4 | 5 |
| **DL1** | 2 | 2 | 4 | 5 | 4 | 5 | 3 | 5 | 4 | 5 |
| **DL2** | 4 | 1 | 4 | 5 | 3 | 4 | 3 | 5 | 4 | 4 |
| **DL3** | 4 | 2 | 4 | 5 | 3 | 2 | 3 | 4 | 3 | 4 |
| **DL4** | 1 | 1 | 4 | 5 | 4 | 3 | 4 | 1 | 4 | 5 |
| **CR1** | 1 | 4 | 4 | 5 | 3 | 5 | 3 | 5 | 4 | 2 |
| **CR2** | 2 | 3 | 4 | 4 | 4 | 5 | 3 | 3 | 4 | 4 |
| **CR3** | 2 | 4 | 4 | 5 | 3 | 5 | 3 | 4 | 3 | 4 |
| **MSCR1** | 1 | 3 | 4 | 4 | 4 | 4 | 3 | 3 | 4 | 5 |
| **MSCR2** | 2 | 3 | 4 | 4 | 4 | 5 | 4 | 4 | 4 | 5 |
| **MSCR3** | 2 | 2 | 4 | 4 | 4 | 4 | 3 | 3 | 4 | 5 |
| **Enterprise nature** | 2 | 3 | 2 | 1 | 2 | 2 | 2 | 3 | 2 | 2 |
| **Enterprise scale** | 6 | 2 | 2 | 6 | 1 | 6 | 4 | 4 | 6 | 5 |
| **Business scope** | 1 | 1 | 2 | 1 | 1 | 1 | 3 | 1 | 1 | 3 |
| **Respondent position** | 1 | 2 | 2 | 2 | 3 | 3 | 2 | 2 | 2 | 2 |

**Continued table (10)**

| **Questions** | **Replier**  **101** | **Replier**  **102** | **Replier**  **103** | **Replier**  **104** | **Replier**  **105** | **Replier**  **106** | **Replier**  **107** | **Replier**  **108** | **Replier**  **109** | **Replier**  **110** |
| --- | --- | --- | --- | --- | --- | --- | --- | --- | --- | --- |
| **EA1** | 1 | 5 | 4 | 3 | 5 | 4 | 2 | 2 | 3 | 4 |
| **EA2** | 1 | 5 | 5 | 4 | 5 | 4 | 4 | 4 | 3 | 4 |
| **EA3** | 1 | 5 | 5 | 4 | 5 | 4 | 2 | 3 | 3 | 2 |
| **EA4** | 1 | 3 | 5 | 4 | 5 | 4 | 4 | 4 | 3 | 2 |
| **AG1** | 1 | 5 | 5 | 4 | 4 | 3 | 4 | 4 | 4 | 2 |
| **AG2** | 1 | 4 | 4 | 4 | 5 | 4 | 4 | 2 | 4 | 2 |
| **AG3** | 1 | 2 | 5 | 4 | 5 | 4 | 4 | 4 | 4 | 2 |
| **AG4** | 1 | 3 | 5 | 4 | 5 | 4 | 4 | 2 | 4 | 4 |
| **SY1** | 4 | 5 | 3 | 5 | 5 | 4 | 4 | 5 | 3 | 4 |
| **SY2** | 1 | 5 | 4 | 5 | 5 | 4 | 4 | 4 | 4 | 4 |
| **SY3** | 1 | 4 | 3 | 4 | 4 | 4 | 4 | 2 | 3 | 2 |
| **SY4** | 1 | 4 | 4 | 4 | 5 | 4 | 4 | 1 | 3 | 2 |
| **DL1** | 1 | 5 | 5 | 4 | 5 | 4 | 4 | 3 | 5 | 4 |
| **DL2** | 1 | 5 | 4 | 4 | 5 | 4 | 4 | 4 | 3 | 4 |
| **DL3** | 1 | 3 | 4 | 4 | 4 | 4 | 4 | 4 | 3 | 4 |
| **DL4** | 1 | 3 | 4 | 3 | 3 | 4 | 2 | 3 | 3 | 4 |
| **CR1** | 1 | 4 | 5 | 4 | 2 | 4 | 2 | 5 | 5 | 2 |
| **CR2** | 1 | 4 | 5 | 4 | 5 | 4 | 4 | 4 | 3 | 4 |
| **CR3** | 1 | 5 | 5 | 5 | 3 | 4 | 4 | 5 | 4 | 4 |
| **MSCR1** | 1 | 3 | 4 | 4 | 2 | 4 | 2 | 4 | 3 | 2 |
| **MSCR2** | 1 | 4 | 2 | 4 | 4 | 4 | 2 | 4 | 4 | 2 |
| **MSCR3** | 1 | 5 | 3 | 4 | 5 | 4 | 4 | 4 | 3 | 2 |
| **Enterprise nature** | 1 | 1 | 1 | 1 | 3 | 2 | 1 | 1 | 1 | 2 |
| **Enterprise scale** | 6 | 1 | 6 | 5 | 2 | 3 | 4 | 1 | 1 | 3 |
| **Business scope** | 1 | 1 | 1 | 1 | 3 | 2 | 1 | 1 | 1 | 10 |
| **Respondent position** | 1 | 1 | 1 | 1 | 2 | 2 | 3 | 3 | 2 | 2 |

**Continued table (11)**

| **Questions** | **Replier**  **111** | **Replier**  **112** | **Replier**  **113** | **Replier**  **114** | **Replier**  **115** | **Replier**  **116** | **Replier**  **117** | **Replier**  **118** | **Replier**  **119** | **Replier**  **120** |
| --- | --- | --- | --- | --- | --- | --- | --- | --- | --- | --- |
| **EA1** | 1 | 3 | 5 | 2 | 3 | 1 | 3 | 4 | 4 | 4 |
| **EA2** | 5 | 4 | 5 | 2 | 4 | 1 | 5 | 4 | 2 | 5 |
| **EA3** | 5 | 4 | 5 | 2 | 2 | 1 | 5 | 5 | 3 | 4 |
| **EA4** | 4 | 2 | 5 | 4 | 4 | 1 | 4 | 5 | 4 | 5 |
| **AG1** | 5 | 2 | 5 | 4 | 2 | 1 | 5 | 5 | 2 | 5 |
| **AG2** | 5 | 4 | 5 | 4 | 4 | 2 | 3 | 5 | 1 | 5 |
| **AG3** | 2 | 2 | 5 | 4 | 4 | 1 | 3 | 5 | 2 | 4 |
| **AG4** | 5 | 4 | 5 | 4 | 2 | 2 | 4 | 5 | 4 | 4 |
| **SY1** | 5 | 4 | 5 | 4 | 4 | 4 | 5 | 5 | 5 | 5 |
| **SY2** | 5 | 4 | 5 | 4 | 4 | 4 | 4 | 5 | 5 | 5 |
| **SY3** | 5 | 4 | 5 | 4 | 4 | 4 | 5 | 4 | 5 | 4 |
| **SY4** | 5 | 4 | 4 | 4 | 2 | 4 | 4 | 5 | 2 | 4 |
| **DL1** | 5 | 5 | 5 | 4 | 4 | 4 | 4 | 5 | 5 | 5 |
| **DL2** | 5 | 4 | 5 | 4 | 4 | 4 | 5 | 5 | 4 | 5 |
| **DL3** | 2 | 2 | 5 | 4 | 3 | 4 | 5 | 5 | 4 | 5 |
| **DL4** | 4 | 4 | 4 | 4 | 2 | 4 | 5 | 4 | 5 | 2 |
| **CR1** | 4 | 2 | 5 | 4 | 4 | 1 | 4 | 5 | 5 | 4 |
| **CR2** | 5 | 4 | 5 | 4 | 2 | 2 | 2 | 5 | 5 | 5 |
| **CR3** | 5 | 3 | 5 | 4 | 5 | 1 | 4 | 5 | 5 | 4 |
| **MSCR1** | 5 | 4 | 5 | 4 | 2 | 4 | 4 | 5 | 4 | 4 |
| **MSCR2** | 4 | 4 | 5 | 4 | 2 | 2 | 4 | 5 | 4 | 4 |
| **MSCR3** | 4 | 4 | 5 | 4 | 3 | 4 | 2 | 5 | 4 | 4 |
| **Enterprise nature** | 2 | 3 | 1 | 1 | 1 | 2 | 2 | 2 | 2 | 2 |
| **Enterprise scale** | 6 | 2 | 6 | 1 | 1 | 1 | 1 | 6 | 6 | 5 |
| **Business scope** | 3 | 3 | 1 | 1 | 1 | 11 | 2 | 2 | 2 | 2 |
| **Respondent position** | 1 | 2 | 2 | 3 | 3 | 2 | 2 | 1 | 2 | 2 |

**Continued table (12)**

| **Questions** | **Replier**  **121** | **Replier**  **122** | **Replier**  **123** | **Replier**  **124** | **Replier**  **125** | **Replier**  **126** | **Replier**  **127** | **Replier**  **128** | **Replier**  **129** | **Replier**  **130** |
| --- | --- | --- | --- | --- | --- | --- | --- | --- | --- | --- |
| **EA1** | 5 | 2 | 3 | 4 | 4 | 4 | 2 | 1 | 2 | 3 |
| **EA2** | 4 | 5 | 3 | 4 | 4 | 4 | 1 | 2 | 4 | 4 |
| **EA3** | 4 | 4 | 1 | 4 | 4 | 4 | 3 | 1 | 4 | 3 |
| **EA4** | 5 | 5 | 4 | 4 | 4 | 4 | 3 | 3 | 4 | 4 |
| **AG1** | 5 | 2 | 3 | 5 | 3 | 5 | 1 | 4 | 5 | 3 |
| **AG2** | 5 | 1 | 4 | 4 | 3 | 5 | 2 | 4 | 4 | 4 |
| **AG3** | 4 | 2 | 1 | 2 | 2 | 4 | 1 | 2 | 3 | 3 |
| **AG4** | 5 | 5 | 1 | 4 | 4 | 5 | 4 | 4 | 4 | 4 |
| **SY1** | 5 | 5 | 4 | 5 | 5 | 2 | 4 | 4 | 4 | 4 |
| **SY2** | 4 | 5 | 4 | 4 | 5 | 4 | 5 | 2 | 4 | 4 |
| **SY3** | 3 | 4 | 4 | 2 | 5 | 5 | 5 | 4 | 4 | 4 |
| **SY4** | 3 | 4 | 4 | 2 | 4 | 5 | 2 | 3 | 4 | 4 |
| **DL1** | 5 | 4 | 2 | 4 | 5 | 5 | 2 | 3 | 5 | 4 |
| **DL2** | 3 | 5 | 4 | 4 | 4 | 5 | 2 | 4 | 4 | 4 |
| **DL3** | 2 | 4 | 1 | 4 | 4 | 5 | 1 | 2 | 5 | 4 |
| **DL4** | 2 | 4 | 3 | 4 | 5 | 4 | 2 | 2 | 2 | 4 |
| **CR1** | 4 | 5 | 1 | 3 | 5 | 5 | 4 | 3 | 3 | 3 |
| **CR2** | 4 | 5 | 4 | 4 | 4 | 5 | 4 | 4 | 4 | 4 |
| **CR3** | 5 | 5 | 3 | 5 | 4 | 5 | 1 | 2 | 4 | 3 |
| **MSCR1** | 5 | 4 | 3 | 4 | 4 | 5 | 4 | 4 | 4 | 4 |
| **MSCR2** | 5 | 4 | 4 | 4 | 4 | 5 | 4 | 4 | 4 | 4 |
| **MSCR3** | 5 | 4 | 3 | 4 | 4 | 2 | 4 | 4 | 3 | 4 |
| **Enterprise nature** | 4 | 2 | 2 | 2 | 2 | 2 | 2 | 3 | 2 | 2 |
| **Enterprise scale** | 6 | 5 | 4 | 6 | 6 | 2 | 5 | 1 | 4 | 5 |
| **Business scope** | 1 | 1 | 2 | 2 | 2 | 9 | 11 | 3 | 2 | 11 |
| **Respondent position** | 3 | 1 | 1 | 3 | 2 | 2 | 1 | 1 | 1 | 3 |

**Continued table (13)**

| **Questions** | **Replier**  **131** | **Replier**  **132** | **Replier**  **133** | **Replier**  **134** | **Replier**  **135** | **Replier**  **136** | **Replier**  **137** | **Replier**  **138** | **Replier**  **139** | **Replier**  **140** |
| --- | --- | --- | --- | --- | --- | --- | --- | --- | --- | --- |
| **EA1** | 1 | 3 | 4 | 4 | 4 | 2 | 4 | 2 | 4 | 4 |
| **EA2** | 4 | 4 | 4 | 5 | 4 | 2 | 4 | 4 | 4 | 4 |
| **EA3** | 1 | 2 | 4 | 5 | 4 | 2 | 2 | 5 | 4 | 4 |
| **EA4** | 2 | 2 | 3 | 4 | 5 | 4 | 4 | 5 | 2 | 4 |
| **AG1** | 5 | 2 | 4 | 5 | 4 | 4 | 3 | 5 | 5 | 2 |
| **AG2** | 4 | 2 | 5 | 5 | 4 | 4 | 4 | 4 | 4 | 4 |
| **AG3** | 2 | 1 | 3 | 5 | 4 | 4 | 2 | 2 | 2 | 4 |
| **AG4** | 1 | 1 | 3 | 4 | 5 | 5 | 4 | 5 | 4 | 4 |
| **SY1** | 5 | 4 | 5 | 5 | 5 | 5 | 5 | 5 | 5 | 5 |
| **SY2** | 5 | 4 | 4 | 4 | 5 | 4 | 5 | 5 | 4 | 5 |
| **SY3** | 2 | 1 | 4 | 5 | 5 | 4 | 4 | 5 | 3 | 4 |
| **SY4** | 4 | 1 | 3 | 4 | 5 | 2 | 4 | 4 | 4 | 4 |
| **DL1** | 4 | 1 | 4 | 4 | 4 | 4 | 2 | 4 | 4 | 5 |
| **DL2** | 5 | 1 | 4 | 4 | 4 | 4 | 1 | 5 | 4 | 5 |
| **DL3** | 3 | 1 | 3 | 5 | 4 | 4 | 3 | 4 | 4 | 5 |
| **DL4** | 4 | 1 | 3 | 4 | 5 | 4 | 3 | 4 | 4 | 4 |
| **CR1** | 1 | 1 | 4 | 5 | 4 | 4 | 3 | 5 | 5 | 5 |
| **CR2** | 3 | 1 | 3 | 4 | 4 | 4 | 1 | 5 | 4 | 4 |
| **CR3** | 4 | 1 | 4 | 4 | 5 | 4 | 3 | 5 | 5 | 5 |
| **MSCR1** | 4 | 2 | 4 | 5 | 5 | 4 | 4 | 5 | 4 | 4 |
| **MSCR2** | 4 | 2 | 3 | 5 | 5 | 4 | 4 | 5 | 4 | 4 |
| **MSCR3** | 4 | 2 | 4 | 5 | 5 | 4 | 4 | 5 | 2 | 4 |
| **Enterprise nature** | 2 | 2 | 2 | 2 | 2 | 2 | 3 | 2 | 2 | 2 |
| **Enterprise scale** | 4 | 1 | 3 | 2 | 6 | 2 | 1 | 4 | 6 | 5 |
| **Business scope** | 11 | 1 | 3 | 9 | 1 | 11 | 3 | 1 | 1 | 1 |
| **Respondent position** | 3 | 3 | 2 | 2 | 2 | 2 | 2 | 2 | 1 | 2 |

**Continued table (14)**

| **Questions** | **Replier**  **141** | **Replier**  **142** | **Replier**  **143** | **Replier**  **144** | **Replier**  **145** | **Replier**  **146** | **Replier**  **147** | **Replier**  **148** | **Replier**  **149** | **Replier**  **150** | **Replier**  **151** |
| --- | --- | --- | --- | --- | --- | --- | --- | --- | --- | --- | --- |
| **EA1** | 3 | 2 | 2 | 4 | 4 | 2 | 5 | 4 | 3 | 2 | 5 |
| **EA2** | 2 | 4 | 1 | 4 | 5 | 3 | 5 | 4 | 4 | 2 | 3 |
| **EA3** | 1 | 4 | 4 | 4 | 5 | 2 | 4 | 4 | 4 | 4 | 3 |
| **EA4** | 2 | 2 | 4 | 4 | 5 | 4 | 4 | 4 | 4 | 4 | 3 |
| **AG1** | 2 | 5 | 2 | 4 | 5 | 5 | 5 | 5 | 3 | 4 | 4 |
| **AG2** | 4 | 4 | 4 | 4 | 4 | 4 | 5 | 5 | 3 | 4 | 4 |
| **AG3** | 2 | 2 | 4 | 4 | 3 | 4 | 5 | 4 | 3 | 4 | 4 |
| **AG4** | 2 | 3 | 5 | 4 | 4 | 4 | 4 | 5 | 2 | 5 | 4 |
| **SY1** | 4 | 4 | 4 | 5 | 5 | 4 | 5 | 5 | 5 | 4 | 5 |
| **SY2** | 4 | 4 | 4 | 5 | 5 | 4 | 5 | 5 | 5 | 4 | 5 |
| **SY3** | 4 | 4 | 4 | 4 | 4 | 4 | 5 | 5 | 4 | 4 | 4 |
| **SY4** | 4 | 2 | 4 | 5 | 3 | 4 | 5 | 5 | 4 | 4 | 4 |
| **DL1** | 3 | 4 | 5 | 5 | 4 | 5 | 5 | 5 | 3 | 4 | 4 |
| **DL2** | 4 | 4 | 5 | 5 | 4 | 5 | 5 | 4 | 4 | 5 | 4 |
| **DL3** | 2 | 2 | 5 | 5 | 4 | 5 | 5 | 5 | 3 | 4 | 3 |
| **DL4** | 2 | 2 | 4 | 3 | 4 | 4 | 4 | 3 | 4 | 4 | 2 |
| **CR1** | 3 | 2 | 4 | 5 | 5 | 4 | 5 | 4 | 3 | 3 | 3 |
| **CR2** | 2 | 2 | 5 | 4 | 4 | 4 | 4 | 4 | 2 | 4 | 4 |
| **CR3** | 4 | 2 | 4 | 5 | 5 | 4 | 5 | 4 | 3 | 3 | 3 |
| **MSCR1** | 2 | 2 | 1 | 4 | 4 | 4 | 4 | 4 | 3 | 4 | 4 |
| **MSCR2** | 2 | 2 | 4 | 4 | 4 | 4 | 4 | 4 | 3 | 4 | 4 |
| **MSCR3** | 2 | 2 | 3 | 4 | 4 | 4 | 5 | 5 | 3 | 4 | 4 |
| **Enterprise nature** | 5 | 2 | 2 | 2 | 2 | 2 | 2 | 3 | 2 | 1 | 2 |
| **Enterprise scale** | 2 | 2 | 6 | 2 | 3 | 4 | 4 | 5 | 2 | 1 | 1 |
| **Business scope** | 2 | 11 | 2 | 11 | 2 | 2 | 10 | 1 | 2 | 1 | 2 |
| **Respondent position** | 2 | 3 | 3 | 3 | 1 | 1 | 2 | 2 | 2 | 3 | 3 |
